1  
2  
3  
4  
5  
6  
7  
8  
9  
10  
11  
12  
13  
14  
15  
16  
17  
18  
19  
20

**Toxoflavin secreted by *Pseudomonas alcaliphila* inhibits growth of *Legionella pneumophila* and its host *Vermamoeba vermiformis***

Sebastien P. Faucher<sup>1,\*</sup>, Sara Matthews<sup>1</sup>, Arvin Nickzad<sup>2</sup>, Passoret Vounba<sup>1</sup>, Deeksha Shetty<sup>1</sup>,  
Émilie Bédard<sup>3</sup>, Michele Prévost<sup>3</sup>, Eric Déziel<sup>2</sup>, Kiran Paranjape<sup>1,4</sup>

- 1) Department of Natural Resource Sciences, Faculty of Agricultural and Environmental Sciences, McGill University, Sainte-Anne-de-Bellevue, QC, Canada
- 2) INRS–Centre Armand-Frappier Santé Biotechnologie, Laval, QC, Canada.
- 3) Department of Civil Engineering, Polytechnique Montréal, Montréal, Québec, Canada.
- 4) Present address: Department of Medical Biochemistry and Microbiology, Uppsala University, Uppsala, Sweden

\* Address correspondence to Sébastien P. Faucher, 21,111 Lakeshore Drive, Ste-Anne-de-Bellevue, Quebec, Canada, H9X 3V9.

Email: [sebastien.faucher2@mcgill.ca](mailto:sebastien.faucher2@mcgill.ca)

Telephone: 514-398-7886

Running title: *P. alcaliphila* inhibits *L. pneumophila*

21 **ABSTRACT**

22 *Legionella pneumophila* is a natural inhabitant of water systems. From there, it can be transmitted  
23 to humans by aerosolization resulting in severe pneumonia. Most large outbreaks are caused by  
24 cooling towers contaminated with *L. pneumophila*. The resident microbiota of the cooling tower  
25 is a key determinant for the colonization and growth of *L. pneumophila*. The genus *Pseudomonas*  
26 correlates negatively with the presence of *L. pneumophila*, but it is not clear which species is  
27 responsible. Therefore, we identified the *Pseudomonas* species inhabiting 14 cooling towers using  
28 a *Pseudomonas*-specific 16S rRNA amplicon sequencing strategy. Cooling towers free of *L.*  
29 *pneumophila* contained a high relative abundance of members from the *Pseudomonas*  
30 *alcaliphila/oleovorans* phylogenetic cluster. *In vitro*, *P. alcaliphila* JCM 10630 inhibited the  
31 growth of *L. pneumophila* on agar plates. Analysis of the *P. alcaliphila* genome revealed the  
32 presence of a genes cluster predicted to produce toxoflavin. *L. pneumophila* growth was inhibited  
33 by pure toxoflavin and by extract from *P. alcaliphila* culture found to contain toxoflavin by LC-  
34 ESI-MS. In addition, toxoflavin inhibits growth of *Vermameoba vermiformis*, a host cell of *L.*  
35 *pneumophila*. Our study indicates that *P. alcaliphila* may be important to restrict growth of *L.*  
36 *pneumophila* in water systems through the production of toxoflavin. A sufficiently high  
37 concentration is likely not achieved in the bulk water but might have a local inhibitory effect such  
38 as in biofilm.

39 **Keywords:** Toxoflavin, *Legionella*, *Pseudomonas*, water, biofilm

40

41

## 42 1. INTRODUCTION

43 Legionellosis is a human respiratory disease caused by the bacterium *Legionella* (Cunha et al.,  
44 2016). *Legionella pneumophila* cause 90% of the cases; the remaining 10% of cases mostly involve  
45 *L. micdadei*, *L. bozemanii*, and *L. Longbeachae* (Cunha et al., 2016). Legionellosis includes  
46 Legionnaires' disease (LD), a systemic infection involving severe pneumonia, and Pontiac fever,  
47 a mild, flu-like disease (Cunha et al., 2016). There is a clear upward trend in the prevalence of  
48 Legionnaires' disease worldwide (Cunha et al., 2016). Such an increase in LD cases could be due  
49 to densification of urban areas, improvement in diagnostic tests and reporting, a greater number of  
50 persons at risk due to aging and/or increase in immunocompromised populations, aging  
51 infrastructures, or climate change (Cunha et al., 2016). Importantly, a study of the impact of  
52 infectious disease in Europe published in 2018 revealed that LD is the fifth most burdensome  
53 disease in people older than 15 years old, after AIDS, tuberculosis, influenza and invasive  
54 pneumococcal disease (Cassini et al., 2018).

55 Not long after the discovery of *Legionella*, it was established that it is transmitted to human by  
56 inhalation of aerosols containing *L. pneumophila* that are generated by engineered water systems  
57 (EWS) (Meyer, 1983). Several type of EWS can shed *L. pneumophila*, including water distribution  
58 systems (showers and faucets), spas, fountains, and cooling towers (Heijnsbergen et al., 2015).  
59 Most of the large outbreaks of LD are caused by cooling towers (Garrison et al., 2016).  
60 Deficiencies in management and operation of water systems is the main cause of outbreak of LD  
61 (Garrison et al., 2016; Mouchtouri et al., 2010).

62 Cooling towers contain a complex microbial ecosystem constituted by a diverse community of  
63 planktonic and biofilm-associated bacteria, protozoa, and algae (Gregorio et al., 2017; Hauer et

64 al., 2016; Llewellyn et al., 2017; Paniagua et al., 2020; Paranjape et al., 2020b, 2020a; Pereira et  
65 al., 2017; Pinel et al., 2021; Tsao et al., 2019). The microbial community in cooling towers is  
66 mostly found in surface attached and floating biofilms which seeds the bulk water with planktonic  
67 microorganisms undefined. The bacterial community identified by different studies varies greatly,  
68 but typical biofilm-forming aquatic bacteria were generally identified, such as  
69 *Sphingomonadaceae*, *Caulobacteraceae* and *Hyphomicrobiaceae* (Gregorio et al., 2017; Paniagua  
70 et al., 2020; Wang et al., 2013). Local temperature seems to influence the composition of the  
71 bacterial and the protozoan community in the attached biofilm (Paniagua et al., 2020). Some  
72 protozoa, such as amoeba and ciliates, prey on other microorganisms and *Legionella* has evolved  
73 to hijack the endocytic pathway of a variety of these phagocytic protozoans to facilitate their own  
74 growth (Boamah et al., 2017; Fields et al., 1984; Paranjape et al., 2020a; Rowbotham, 1980). In  
75 fact, most, if not all, of the multiplication of *Legionella spp.* in water system occurs inside these  
76 host cells (Boamah et al., 2017). Protozoal hosts also shield *Legionella* against deleterious  
77 conditions (Boamah et al., 2017). Therefore, *Legionella*'s presence in engineered water systems is  
78 strongly associated with the presence of host cells (Boamah et al., 2017). In multi-species biofilm,  
79 *L. pneumophila* has been found associated with amoebas and other phagocytic protozoans and in  
80 dense microcolonies (Taylor et al., 2013).

81

82 Several bacteria inhibit the growth of *L. pneumophila* on solid medium, including species of  
83 *Aeromonas*, *Bacillus*, *Flavobacterium*, *Pseudomonas*, *Acinetobacter*, *Kluyvera*, *Rahnella*,  
84 *Burkholderia*, *Staphylococcus*, *Stenotrophomonas* or *Sphingobacterium* (Corre et al., 2021, 2019;  
85 Guerrieri et al., 2008; Loiseau et al., 2015; Temmerman et al., 2007; Verdon et al., 2008). The  
86 active substances responsible for the inhibition were only identified for a fraction of these species.

87 *Staphylococcus warneri* produces an antimicrobial peptide named warnericin (Verdon et al.,  
88 2008). In the case of *Bacillus*, secreted proteases and surfactin were identified to have an anti-  
89 *Legionella* effect (Loiseau et al., 2015). *Pseudomonas fluorescens* produces the volatile compound  
90 1-undecene that inhibits the growth of *L. pneumophila* in a separate but nearby dish, a phenomenon  
91 that was called aerial killing (Corre et al., 2021, 2019). These studies indicate that the cooling  
92 tower microbiota likely produces a wide range of biomolecules, including proteins, antimicrobial  
93 peptides, and biosurfactants, that can have deleterious effects on *L. pneumophila* and its natural  
94 hosts in water systems (Berjeaud et al., 2016).

95

96 Several studies have shown that the composition of the microbial community in cooling towers is  
97 influenced by the disinfection regime (Llewellyn et al., 2017; Paranjape et al., 2020b; Pereira et  
98 al., 2017; Tsao et al., 2019). There is also strong inverse relationship between *L. pneumophila* and  
99 *Pseudomonas* in cooling towers (Llewellyn et al., 2017; Paranjape et al., 2020b; Tsao et al., 2019).

100 These observations are consistent with our previous study that found that continuous chlorine  
101 application reduced microbial diversity, decreasing the abundance of *L. pneumophila* while  
102 increasing the abundance of *Pseudomonas* (Paranjape et al., 2020b). *Pseudomonas* is a large genus  
103 and several species of *Pseudomonas* inhabit cooling towers (Pereira et al., 2018). Which one  
104 correlates negatively with *L. pneumophila* in real cooling towers remains unknown. The goal of  
105 the present study was to identify the species of *Pseudomonas* associated with the absence of *L.*  
106 *pneumophila* in cooling towers and identify molecules possibly involved in this competitive  
107 relationship.

108

## 109 2. MATERIALS AND METHODS

### 110 2.1 Bacterial strains and cultures

111 *L. pneumophila* strains Philadelphia 1 (ATCC 33152) and lp120292, which was involved in the  
112 LD outbreak in Quebec City in 2012 (Lévesque et al., 2014) and is hereafter referred to as the  
113 Quebec strain, were used as test strains. Strains stored at -80°C in 10% glycerol were cultured  
114 aerobically at 37°C for 3 days on buffered charcoal yeast extract (BCYE) agar supplemented with  
115 0.25 mg/ml L-cysteine and 0.4 mg/ml ferric pyrophosphate. *Pseudomonas alcaliphila* strain JCM  
116 10630 (CIP 108031T) was acquired from the Centre de Ressources Biologiques de l'Institut  
117 Pasteur and grown on nutrient agar at 30 °C. AYE broth (BCYE without agar and charcoal) or  
118 Fraquil, an approximate freshwater media (Morel et al., 1975), were used as liquid medium.

### 119 2.2 *Pseudomonas*-specific 16S amplicon sequencing

120 The *Pseudomonas*-specific 16S amplicon sequencing strategy previously published by *Pereira et*  
121 *al.* (2018) (Pereira et al., 2018) was used to identify the species of *Pseudomonas* present in 14  
122 cooling towers sampled in a previous study (Paranjape et al., 2020b). A two-step PCR strategy  
123 was used to amplify the V3-V4 region of *Pseudomonas* 16S rRNA and add indices using Paq5000  
124 polymerase. The DNA was first amplified with the Pse434F (5'-  
125 TCGTCGGCAGCGTCAGATGTGTATAAGAGACAGACTTTAAGTTGGGAGGAAGGG-3')  
126 and Pse665R (5'-GTCTCGTGGGCTCGGAGATGTGTATAAGAGACAG  
127 ACACAGGAAATTCCACCACCC-3') containing 5' overhang for Illumina Nextera Indexing kit  
128 (underlined). An initial denaturation step of 2 minutes at 95°C was used followed by 30 cycles  
129 consisting of 30 s at 95°C, 30 s at 58°C and 30 s at 72°C, and a final elongation step of 7 min at

130 72°C. The amplicons were purified with AMPure XP beads as per the manufacturer's instruction.  
131 Indexing PCR was then performed with the Nextera XT index kit, according to the manufacturer's  
132 instruction. The amplicons were purified as above and quantified using Quant-iT PicoGreen  
133 dsDNA Assay Kit (Invitrogen). The amplicons were sequenced on an Illumina MiSeq using the  
134 V2 250 bp paired end reagent kit. The data are available from the Sequence Read Archive under  
135 the BioProject accession number PRJNA787128.

136 The resulting sequences were processed using DADA2 (Callahan et al., 2016) implemented in  
137 Qiime 2 version 2018.8 (Bolyen et al., 2019). The sequences were trimmed by 21 nt and truncated  
138 to 200 nt. The dataset was rarefied to 50,000 sequences per samples. The taxonomic assignment  
139 to the genus level of the resulting amplicon sequence variants (ASV) was assigned using a  
140 classifier trained on the SILVA SSU database 132 (Quast et al., 2013), according to Qiime 2  
141 instructions. Species-level taxonomic assignment of the ASVs was performed using BLAST+  
142 against the curated 16S rRNA sequences of *Pseudomonas* as previously described (Pereira et al.,  
143 2018). This dataset was then further analyzed using MicrobiomeAnalyst (Chong et al., 2020) to  
144 calculate Shannon diversity and perform linear discriminant analysis effect size (LEfSe) (Segata  
145 et al., 2011).

### 146 **2.3 *Legionella pneumophila* inhibition assay**

147 *Anti-Legionella* assay was performed using a soft agar overlay technique. Briefly, a suspension of  
148 *L. pneumophila* strains, Quebec and Philliladelphia-1, and *P. alcaliphila* were prepared in AYE  
149 broth and adjusted to an OD<sub>600nm</sub> of 0.2. Then 200 µl of *Legionella* suspension was added to 5 ml  
150 of autoclaved soft agar (0.5% of agar in ddH<sub>2</sub>O) and gently poured on the surface of solidified  
151 CYE agar plate. The plates were left to solidified in a biological safety cabinet for 15 minutes.

152 Then, a 10  $\mu$ l drop of *P. alcaliphila* suspension was inoculated in the middle of the plates. Plates  
153 were incubated at 25 °C, 30 °C and 37 °C for 3 days and the diameter of the *P. alcaliphila* colony  
154 and the zone of inhibition was measured.

#### 155 **2.4 Organic extraction of toxoflavin from *P. alcaliphila* supernatant**

156 Chloroform extraction was performed as previously described (Chen et al., 2012) with slight  
157 modifications. *P. alcaliphila* was grown on CYE plate for 4 days at 30 °C. The bacterial cells were  
158 removed from the surface of the agar using a cell scraper and the agar was cut in smaller pieces  
159 using a sterile razorblade. The chopped agar was then mixed with chloroform in 1:1 (w/v) ratio in  
160 50 ml falcon tube for extraction of toxoflavin. The chloroform fraction (~25 ml) was filtered  
161 through Filtropur S 0.2  $\mu$ m filter (Sarsted) and left to fully evaporated in the fume hood. The  
162 extract was then resuspended in 200  $\mu$ l of methanol. The agar from a sterile CYE plate was  
163 processed the same way to serve as a negative control. Extracts were tested with the disc diffusion  
164 assay described below.

#### 165 **2.5 Disc diffusion assay**

166 The susceptibility of the test strains to commercial toxoflavin (Sigma-Aldrich) and *P. alcaliphila*  
167 extracts was assessed by adapting the soft overlay agar technique previously described. Instead of  
168 adding the *P. alcaliphila* suspension to the center, a sterile paper disc was placed and 10  $\mu$ l of  
169 extract or a range of commercial toxoflavin concentrations (0 ng/ $\mu$ l, 50 ng/ $\mu$ l, 100 ng/ $\mu$ l, 250 ng/ $\mu$ l  
170 and 1000 ng/ $\mu$ l) was added to the disc. Plates were incubated at 30 °C for 3 days and the zone of  
171 inhibition was measured.

#### 172 **2.6 LC-ESI-MS analysis of toxoflavin**



173 Liquid chromatography/mass spectrometry analysis was performed by using high performance  
174 liquid chromatography (HPLC; Waters 2795, Mississauga, ON, Canada) equipped with a 100 ×  
175 4.6 mm i.d. Kinetex C8 (Phenomenex) reversed-phase column (particle size 2.6 μm) using a  
176 MeCN/H<sub>2</sub>O gradient containing 1% acetic acid at a flow rate of 400 μl/min. The detector was triple  
177 quadrupole mass spectrometer (Quattro Premier XE, Waters) equipped with a Z-spray interface  
178 using electrospray ionization in positive mode. Analyses were carried out in both MS full-scan and  
179 MS/MS multiple reaction monitoring (MRM) scan modes with a mass-to-charge ratio (m/z)  
180 window ranging from 130–930. The capillary voltage was set at 3.5 kV and the cone voltage at 30  
181 V. The source temperature was kept at 120 °C and the desolvating gas at 200 °C. Nitrogen was  
182 used as the cone and desolvation gas and argon was used as collision gas at collision energies up  
183 to 30 eV.

## 184 **2.7 Biofilm and pellicle assay.**

185 The biofilm-formation ability of *P. alcaliphila* was investigated by inoculating media with  
186 bacterial. Briefly, 1 mL of trypticase soy broth, King's B, or R2-A broth was added to center four  
187 wells of a 24-well plate. Surrounding wells were filled with sterile water to prevent desiccation.  
188 Then, 20 μL of *P. alcaliphila* in Fraquil (OD<sub>600nm</sub> = 0.1) was added to each well and incubated at  
189 room temperature with or without shaking at 150 rpm. After a week, images of the wells were  
190 taken. When incubated without shaking, plates were shaken at 150 rpm for 1 hour to determine if  
191 pellicles could be formed.

## 192 **2.8 *Vermamoeba vermiformis* inhibition assay**

193 The sensitivity of *L. pneumophila* host *Vermamoeba vermiformis* to toxoflavin was determined by  
194 monitoring its growth in the presence of toxoflavin. *V. vermiformis* were grown at room  
195 temperature in 75 cm<sup>2</sup> cell culture flasks (Sarstedt) in modified PYNFH medium (ATCC medium  
196 1034) and passaged when confluence was reached. The amoebas were passaged 3 days prior to  
197 exposure by adding 5 mL of culture to 20 mL of fresh modified PYNFH. Cell concentration was  
198 with a Guava EasyCyte flow cytometer. To prepare samples for flow cytometer, 400 µL of culture  
199 was centrifuged at 5000 g for 2 min, the supernatant discarded, and the pellet resuspended in 400  
200 µL of phosphate buffered saline (PBS). The stock culture was diluted to  $5 \times 10^4$  cells/mL in fresh  
201 modified PYNFH and 900 µL was added to the wells of a 24-well plate. Then 100 µL of different  
202 toxoflavin solutions were added to wells to give final toxoflavin concentrations of 0, 10, 25, 50 or  
203 100 µg/mL. The plate was incubated at room temperature without shaking. After 2 and 4 days, 400  
204 µL samples were taken from each well to measure cell concentration with flow cytometer. Each  
205 condition was performed in triplicate. Results were analyzed using two-way ANOVA, with time  
206 and toxoflavin concentration as factors, and Tukey's test correction for multiple comparison was  
207 used to assess significance between conditions.

208

### 209 **3. RESULTS**

#### 210 **3.1 Profiling of *Pseudomonas* species in cooling towers**

211 *Pseudomonas*-specific 16S rRNA amplicon sequencing was performed on triplicate samples from  
212 14 cooling towers. The microbiota of these cooling towers was previously studied using 16S rRNA  
213 sequencing and 18S rRNA sequencing (Paranjape et al., 2020b, 2020a). For *Pseudomonas*-specific

214 16S rRNA amplicon sequencing, a total of 4,680,703 reads were obtained and processed with  
215 Qiime using the DADA2 pipeline (Bolyen et al., 2019; Callahan et al., 2016). A no template  
216 control and DNA extracted from a blank cartridge were also included. As can be seen in Figure  
217 2, these 2 control samples contained very few sequences passing quality control, indicating that  
218 the amplicons from the cooling tower samples are not contaminated by spurious sequences. The  
219 cooling tower samples contained a minimum of 51089 sequences passing quality control. The data  
220 set was rarefied to 50000 sequences per cooling tower. All sequences were assigned to  
221 *Pseudomonas*, showing the high specificity of the primers used, as previously reported (Pereira et  
222 al., 2018)  
223

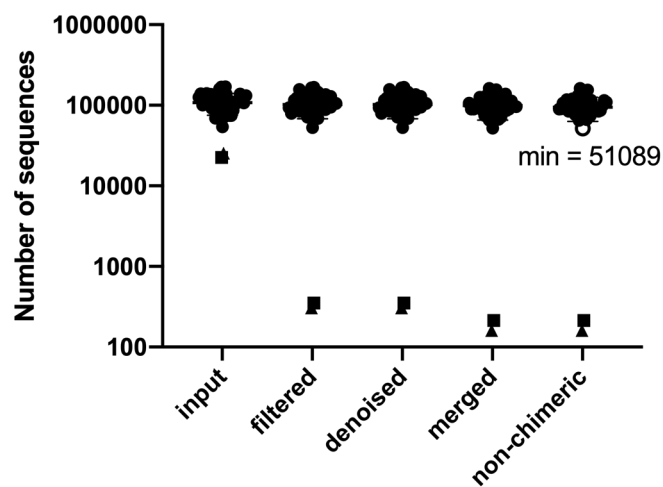

224  
225 Figure 1: Total number of sequences obtained (input) and left after each one of the processing  
226 steps. Square, no template control; triangle, blank cartridge. The sample with the least number of  
227 sequences is depicted by an open circle.

228  
229 Considering all the cooling towers, 34 *Pseudomonas* species were found among which 14 can be  
230 described as major or abundant species and the other 20 as minor species, collectively representing

231 less than 5% of the population. Of note, this method is unable to differentiate closely related  
232 species, such as *P. alcaliphila* and *P. oleovorans*. Such species are therefore grouped in clusters.  
233 The highest diversity of *Pseudomonas* species was observed in cooling towers Cdq1 and Est1  
234 containing 26 and 13 different species, respectively, followed by CT CN3, CN4 and MTL5 (Figure  
235 2A). Globally, the top three most abundant *Pseudomonas* species in the studied cooling towers  
236 were *P. alcaliphila/oleovorans*, *P. monteilii* and *P. alcaligenes*. *P. alcaliphila/oleovorans* was  
237 observed in nearly 100% of cooling towers in various proportions, but was the largely dominant  
238 *Pseudomonas* species in several cooling towers including CN2, Out1, Out2, Mont1, MTL1,  
239 MTL4, MTL7 and MTL8 (Figure 2A). The human pathogen *P. aeruginosa* was detected only in  
240 towers CdQ1 and Est2 at a low abundance of 0.01. Next, we calculated the abundance of each  
241 *Pseudomonas* species as a fraction of relative bacterial abundance (Paranjape et al., 2020b). As  
242 can be seen in Figure 2B, *P. alcaliphila/oleovorans* is the most abundant *Pseudomonas* species in  
243 cooling tower microbiomes dominated by *Pseudomonas*, including cooling towers Out1, Mont1,  
244 and MTL1.

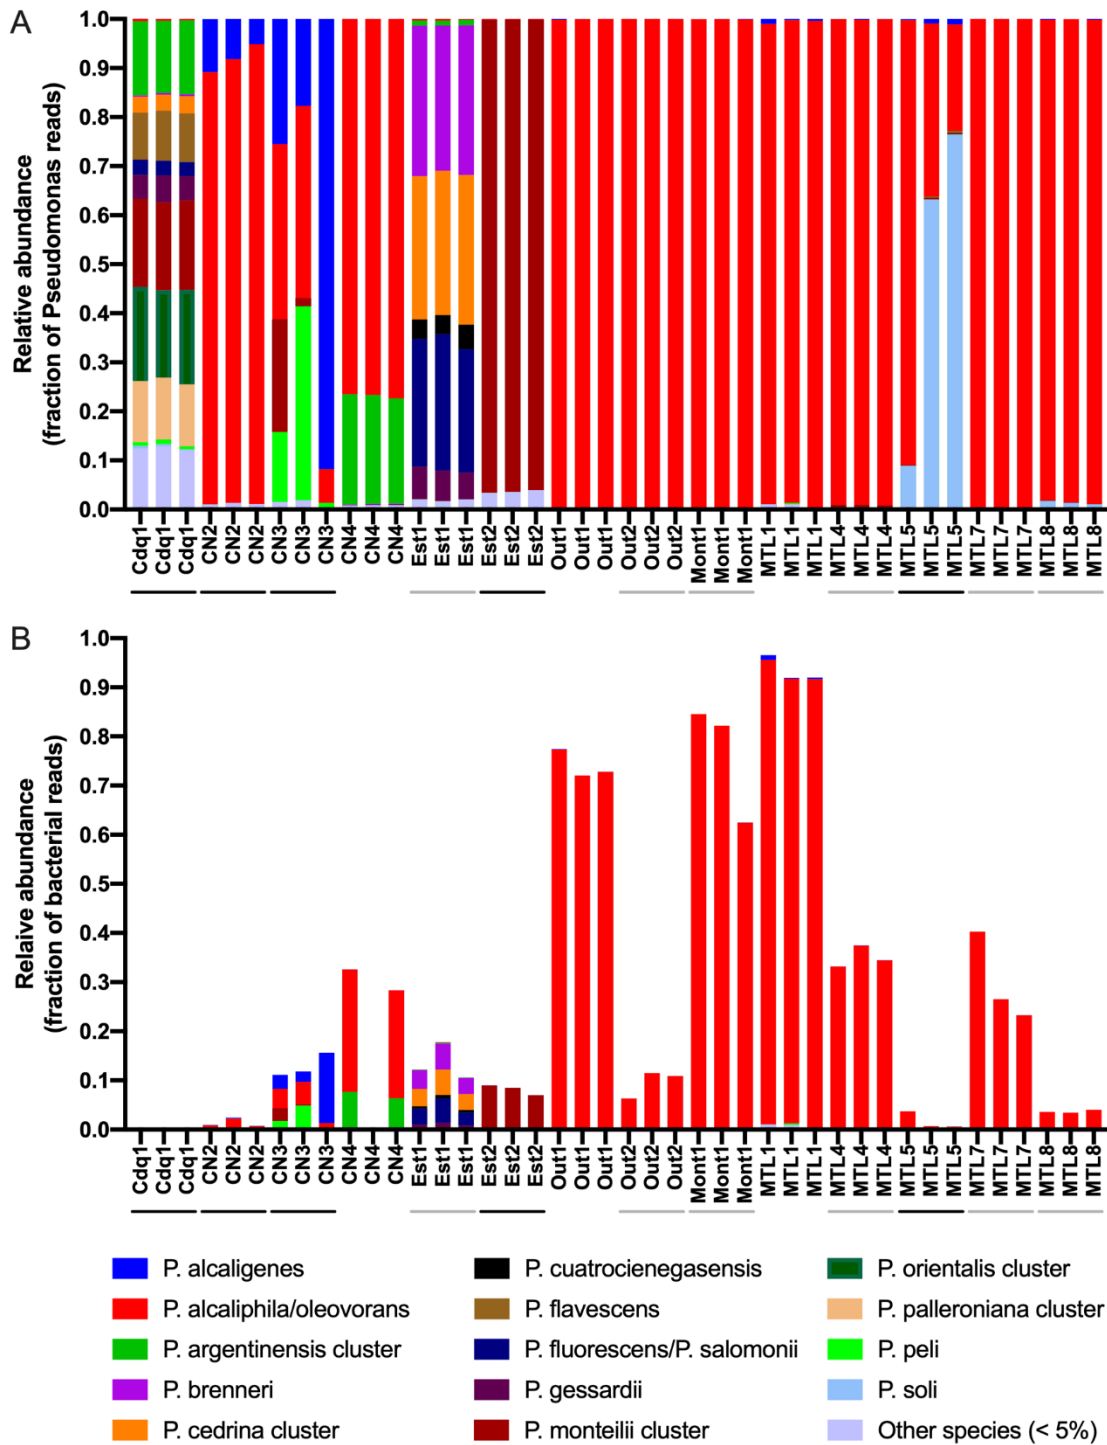

245

246 **Figure 2.** Relative abundance of *Pseudomonas* species as a fraction of *Pseudomonas* reads (A)

247 and as a fraction of bacterial reads (B). Species with a maximum relative abundance of less than

248 5% in any towers were grouped together in the category “other species”. The presence of  
249 *Legionella* in each tower is depicted by a line under the cooling tower’s name; a grey line indicate  
250 the presence of *Legionella* species other than *pneumophila*, a black line indicate the presence of *L.*  
251 *pneumophila* (Paranjape et al., 2020b).

252 Next, we sought to identify factors influencing the diversity of *Pseudomonas* within the cooling  
253 towers. Shannon diversity was calculated for each tower (Figure 3A). As expected, cooling towers  
254 CdQ1 and Est1 have the highest shannon diversity, while the cooling towers dominated by *P.*  
255 *alcaliphila* had the lowest diversity. In our previous study, we determined that chlorine application  
256 schedule had a greater impact than chlorine concentration in shaping the bacterial communities  
257 (Paranjape et al., 2020b). Similarly, treatment schedule seems to affect *Pseudomonas* diversity as  
258 tower treated by periodic applications showed significantly less diversity ( $P = 0.03$ ) than cooling  
259 towers treated continuously (Figure 3B). Concentration of total chlorine and residual chlorine did  
260 not seem to affect *Pseudomonas* diversity. The slopes of the Shanon Diveristy against the  
261 concentration of total chlorine ( $-0.599 \pm 0.502$ ) and against the concentration of residual chlorine  
262 ( $-0.107 \pm 0.073$ ) were not significantly different than zero (Figure 3C and 3D).

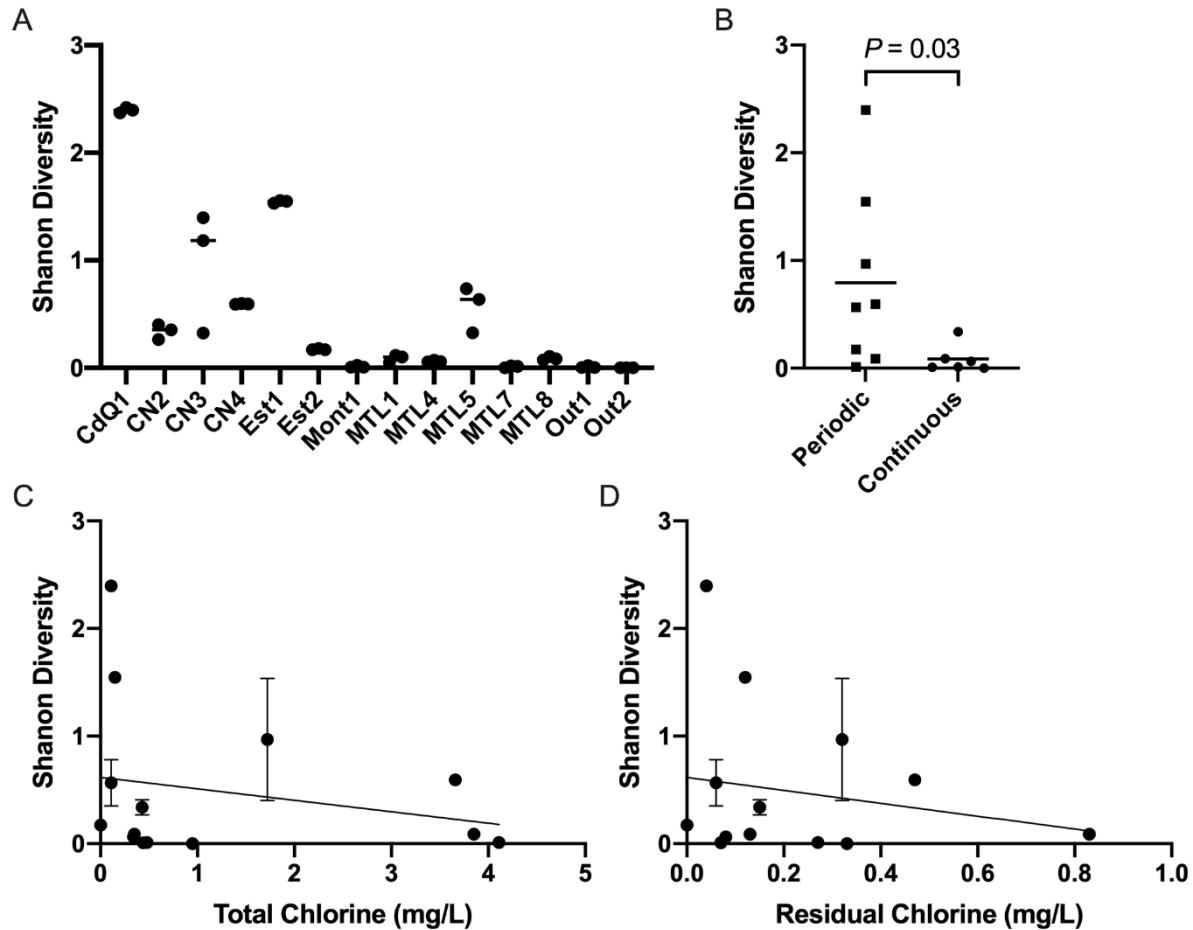

263

264 Figure 3: Treatment application schedule but not chlorine concentration affect *Pseudomonas*

265 diversity. Shannon diversity index was calculated for each cooling towers (A) to evaluate alpha

266 diversity. Individual replicate values are shown. Average Shannon diversity index was calculated

267 and each tower was classified according to the treatment schedule (B). A one-tail t-test was used

268 to assess statistical significance between the two groups. The average Shannon diversity index  $\pm$

269 standard deviation was plotted against total chlorine (C) and residual chlorine concentration (D).

270 A simple linear regression model was used to determine if the slope was significantly different

271 than zero.

272

273 We next used linear discriminant analysis effect size (LEfSe) implemented in MicrobiomeAnalyst  
274 (Chong et al., 2020) to examine the differences in the abundance of *Pseudomonas* species relative  
275 to the bacterial reads in cooling towers. LEfSe is an algorithm that uses a mix of statistical testing,  
276 linear discriminant analysis (LDA), and effect size to identify taxa that are predictive of a particular  
277 condition (Segata et al., 2011). The treatment schedule and the presence or absence of *Legionella*  
278 *spp.* and *Legionella pneumophila* were considered as comparison factors (Paranjape et al., 2020b).  
279 *P. alcaliphila/oleovorans* was the only species enriched in cooling towers free of *L. pneumophila*  
280 and free of *Legionella spp.* (Figure 4A and B). In contrast, *P. montelli* cluster was enriched in  
281 towers containing *Legionella* or *L. pneumophila*, *P. alcaligenes* was enriched in cooling towers  
282 containing *L. pneumophila*, and *P. soli* was enriched in towers containing *Legionella spp.* (Figure  
283 4A and B). By considering the treatment schedule, *P. alcaliphila/oleovorans* and *P. anguiliseptica*  
284 were associated with continuous treatment whereas *P. monteilii* and *P. soli* were associated with  
285 periodic treatment (Figure 4C).



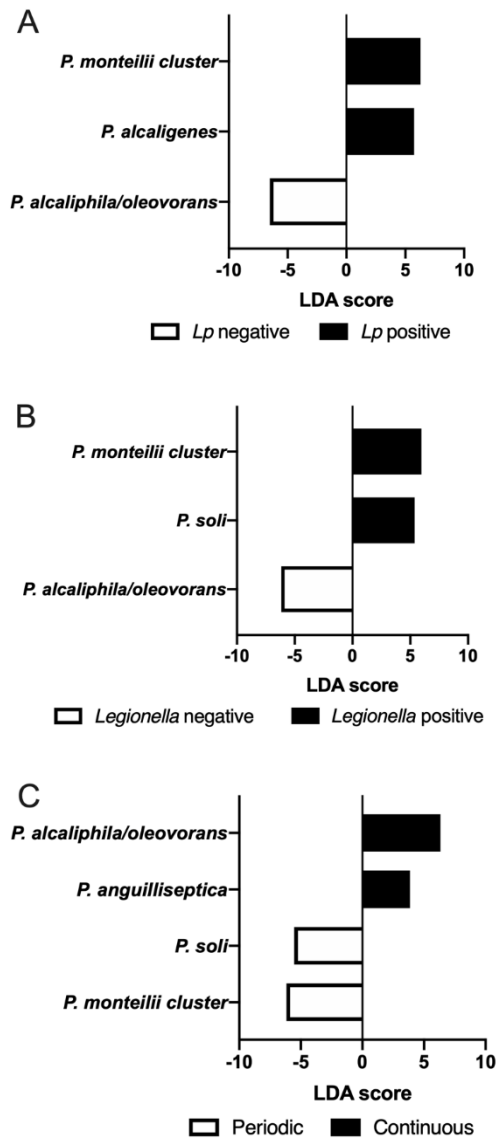

286

287 **Figure 4. *P. alcaliphila/oleovorans* is enriched in towers free of *Legionella* and associated with**  
288 **continuous treatment.** LDA scores of *Pseudomonas* species associated with the presence of *L.*  
289 *pneumophila* (A), the presence of *Legionella* spp. (B) and treatment schedule (C). Only species  
290 with  $P < 0.05$  are shown.

291

### 292 3.2 Anti-*L. pneumophila* activity of *P. alcaliphila*

293 Our results revealed that a member of the *P. alcaliphila/oleovorans* cluster seems to be the main  
294 inhibitor of *L. pneumophila* colonisation in the cooling towers we studied. Therefore, we  
295 investigated if an isolate of that cluster, *P. alcaliphila* strain JCM 10630, can inhibit *L.*  
296 *pneumophila* growth *in vitro* (Yumoto et al., 2001).

297 We carried out *L. pneumophila* inhibition assay at three different temperatures: 25 °C, 30 °C and  
298 37 °C. After three days of incubation, *P. alcaliphila* inhibited the growth of *L. pneumophila* at 25  
299 °C and 30 °C but not at 37 °C (Figure 5). A one-way ANOVA with a Tukey correction for multiple  
300 comparison was used to assess significance between conditions. The diameter of inhibition was  
301 significantly larger at 25 °C than at 30 °C for both strains ( $P < 0.001$ ). The two strains tested showed  
302 similar inhibition zones at each temperature tested ( $P > 0.6$ ). The size of the colony of *P.*  
303 *alcaliphila* was significantly larger at 25 °C than at 30 °C ( $P < 0.001$ ). The strain of *L. pneumophila*  
304 seems to influence slightly the growth of *P. alcaliphila* at 25 °C as the colony was slightly larger  
305 (14.3 mm) when grown with the Quebec strain than with the Philadelphia-1 strain (13 mm,  $P =$   
306 0.02). There were no difference in colony size at 30 °C.

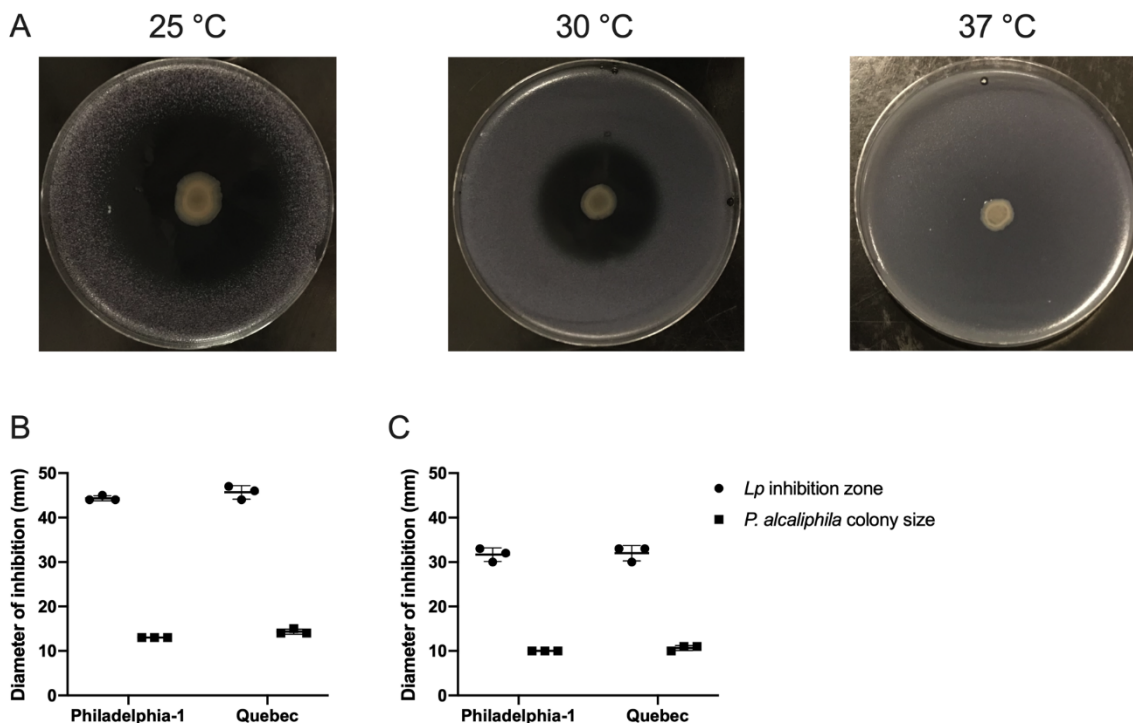

307

308 **Figure 5. *P. alcaliphila* inhibits the growth of *L. pneumophila* at 25 °C and 30 °C. *L.***  
309 *pneumophila* strain Philadelphia-1 and the Quebec strain were inoculated on CYE plates in a thin  
310 layer of soft agar. Once solidified, *P. alcaliphila* was inoculated in the center of the plate. A)  
311 Representative image of plates incubated at 25 °C (left panel), 30 °C (center panel) and 37 °C  
312 (right panel). The diameter of inhibition (circle) and the diameter of the *P. alcaliphila* colony  
313 (square) for three replicates was recorded for plates incubate at 25 °C (B) and at 30 °C (C).

314

### 315 3.3 In silico analysis of *P. alcaliphila* genome

316 The *P. alcaliphila* strain JCM 10630 genome was retrieved from RefSeq (GCF\_900101755.1) and  
317 was analysed to identify clues as to the cause of the inhibition of *L. pneumophila* growth. We first  
318 used antiSMASH (Blin et al., 2019) to identify putative biosynthetic gene clusters (BCGs). Five

319 clusters were found but none showed similarity higher than 50% with known clusters (Table 1).  
320 Next, we used the Blast KOALA function of the Kyoto Encyclopedia of Genes and Genomes to  
321 assign Kegg orthology annotation to the genes and predict metabolic pathways present in this  
322 genome (Kanehisa et al., 2016). A cluster of genes homologous to toxoflavin synthesis cluster was  
323 detected. Toxoflavin is an important virulence factor of the plant pathogen *B. glumae* (Suzuki et  
324 al., 2004). Toxoflavin is also produced by *Pseudomonas protegens* Pf-5 (Philmus et al., 2015).  
325 The *P. alcaliphila* toxoflavin cluster is most homologous to *B. glumae* cluster and organized in a  
326 similar manner (Chen et al., 2012; Philmus et al., 2015; Suzuki et al., 2004). The homology of *P.*  
327 *alcaliphila* genes compared to *B. glumae* varies between 69% identity to 36% identity (Table 2).  
328 Our *in silico* analysis suggests that the inhibition of *L. pneumophila* growth by *P. alcaliphila* could  
329 be due to the production of toxoflavin, another compound, or a mixture of several molecules.

330

### 331 **3.4 Toxoflavin inhibits growth of *L. pneumophila* on CYE plate**

332 The susceptibility of the two strains of *L. pneumophila* to toxoflavin was tested using a dilution  
333 series of commercial toxoflavin (Sigma-Aldrich). The results showed that the size of the inhibition  
334 zone proportionally increases with concentration of toxoflavin for both strains (Figure 6). The  
335 diameters of the inhibition zone were 10 mm, 12 mm, 20 mm and 30 mm for concentrations of  
336 0.5, 1, 2.5 and 10  $\mu\text{g}$ , respectively.

337

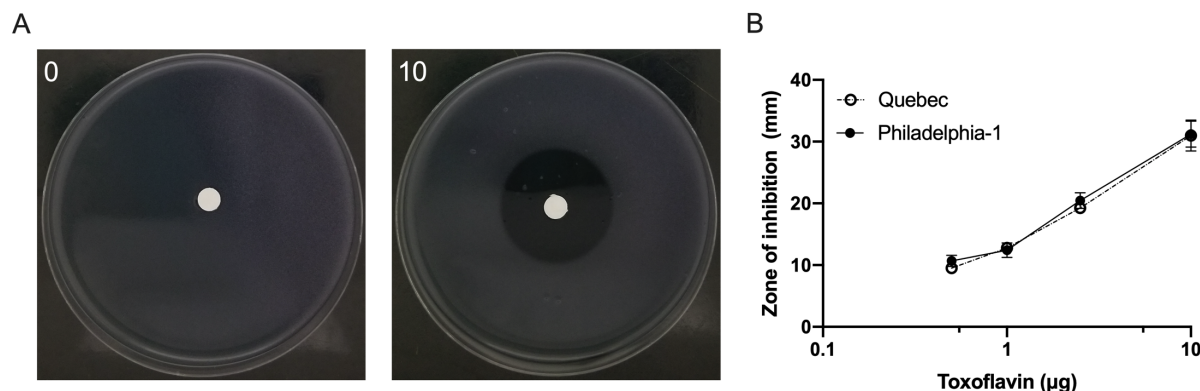

338  
339 **Figure 6. Toxoflavin inhibits the growth of *L. pneumophila* on CYE plates.** A disc diffusion  
340 assay was used to test the susceptibility of two *L. pneumophila* strains to 0.5, 1, 2.5 and 10 µg of  
341 toxoflavin at 30°C. Representative image for *L. pneumophila* strain Philadelphia-1 at 0 and 10 µg  
342 is shown in A. The average and standard deviation of the size of the zone of inhibition for each  
343 concentration tested in triplicate for *L. pneumophila* strain Quebec and Philadelphia-1 is shown in  
344 B.

345

### 346 **3.5 Toxoflavin is secreted by *P. alcaliphila* on CYE agar plate**

347 In order to confirm that *P. alcaliphila* produces toxoflavin, we performed chloroform extraction  
348 from CYE plate inoculated with a pure culture of *P. alcaliphila*. Controls included an extract from  
349 a sterile CYE plate and the methanol carrier alone. *L. pneumophila* growth was inhibited by the  
350 extract from plates inoculated with *P. alcaliphila* (Figure 7C) slightly more than sterile CYE and  
351 methanol (Figure 7A and B), with zone of inhibitions of 12, 10 and 10 mm, respectively. In order  
352 to confirm that toxoflavin was present, the extracts were then subjected to LC-ESI/MS. Pure  
353 toxoflavin solution produced a strong peak at  $m/z=194.0$  (Figure 7D). The same strong peak  
354 appeared in extract from *P. alcaliphila* plate extracts (Figure 7F) while being absent in the control

355 (Figure 7E). These results were also confirmed with LC-ESI-MS/MS in MRM mode  
356 (Supplementary Figure S1).

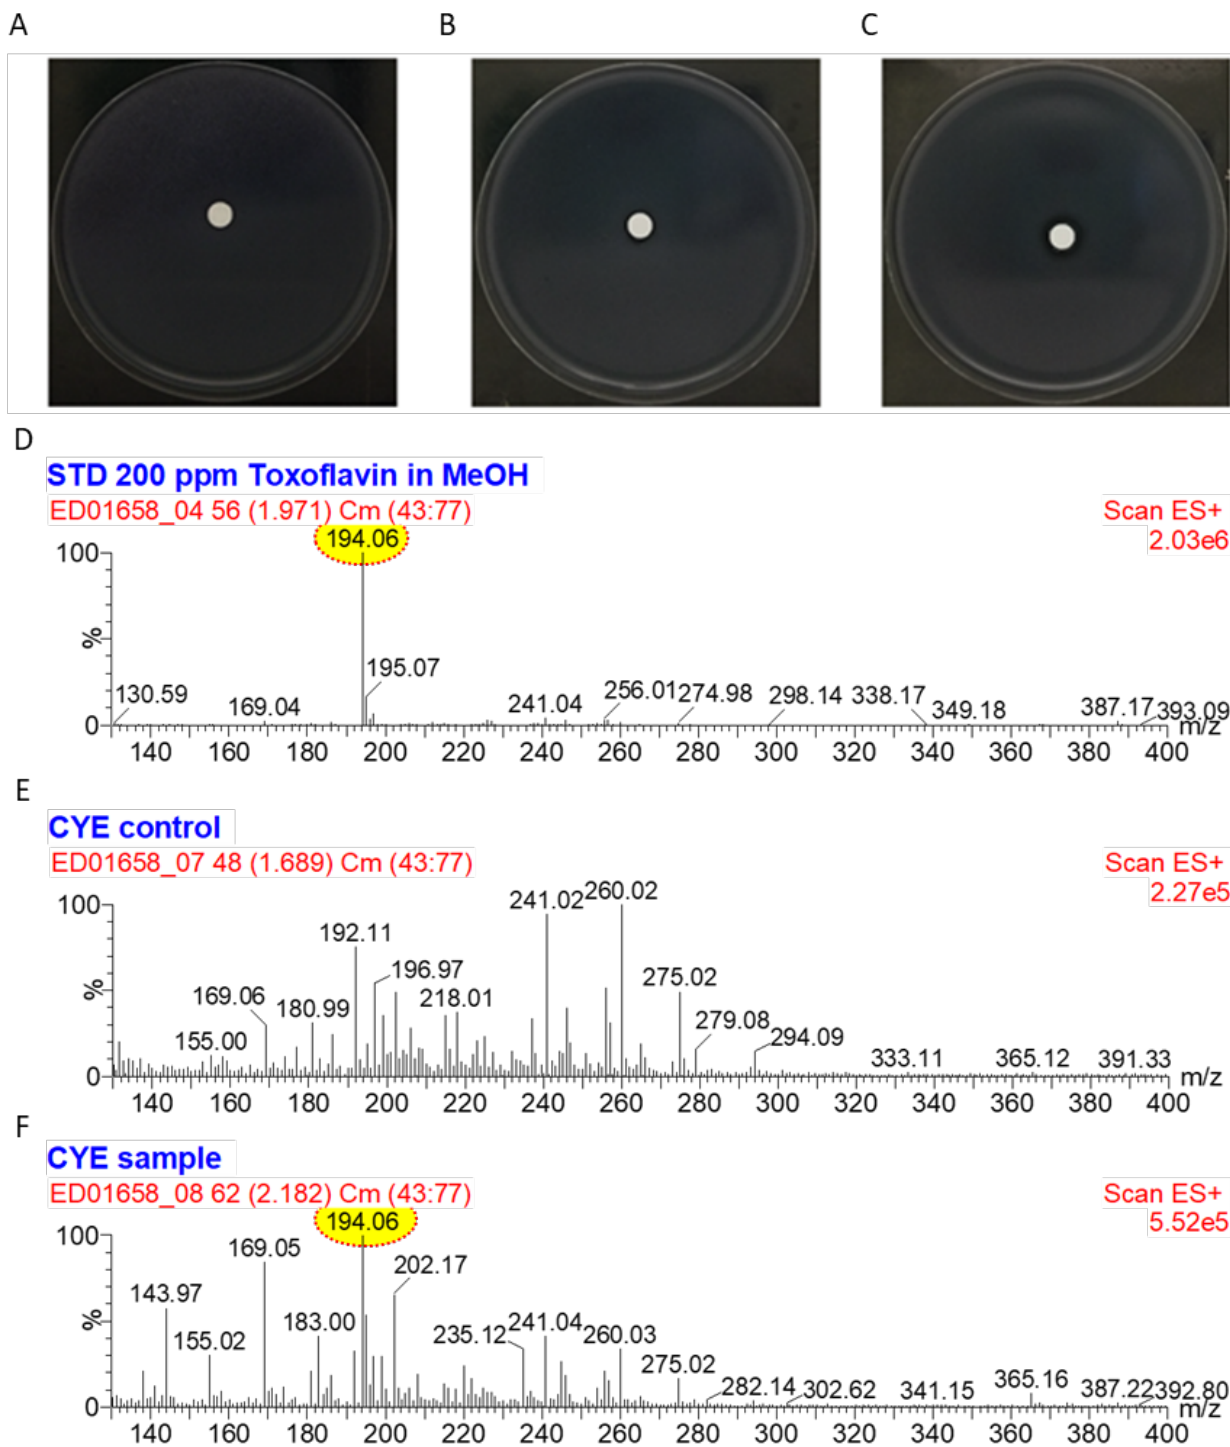

357

358 **Figure 7. Organic extract of *P. alcaliphila* culture inhibits *L. pneumophila* growth and**  
359 **contains toxoflavin.** Disc diffusion assay was used to test the growth inhibition activity of  
360 methanol (A), organic extracts from sterile CYE plate (B), and CYE plate covered by a lawn of *P.*  
361 *alcaliphila* (C). The production of toxoflavin ( $m/z = 194.0$ ) by *P. alcaliphila* was confirmed with  
362 LC-ESI-MS by analysing the mass spectrum of pure toxoflavin (D) and comparing it to those of  
363 extract from sterile CYE plate (E) and extract from CYE plate covered by *P. alcaliphila* (F).

364

### 365 **3.6 *P. alcaliphila* produces floating biofilm mat**

366

367 Many *Pseudomonas* species can produce attached biofilms or floating biofilm mats (Mann and  
368 Wozniak, 2012). Therefore, we investigated the ability of *P. alcaliphila* JCM 10630 to form these  
369 structures. First, we tested the production of attached biofilm in R2A, King's B, and in trypticase  
370 soy broth at room temperature under shaking. After one week, no attached biofilm was seen,  
371 however a filamentous floating mass of cells could be seen in both R2A and trypticase soy broth  
372 (Figure 8A). We then tested the production of a pellicle by incubating *P. alcaliphila* in the same  
373 three media but without shaking. No pellicle was formed in any of these media (Figure 8B).  
374 Nevertheless, we could see a mat at the bottom of the well in all case. Shaking for 1 h dislodge the  
375 mat produced in trypticase soy broth and R2A, resulting in a floating mat similar to what was seen  
376 after incubation with shaking (Figure 8A). We therefore concluded that *P. alcaliphila* may  
377 produce floating biofilm mats in cooling towers.

378

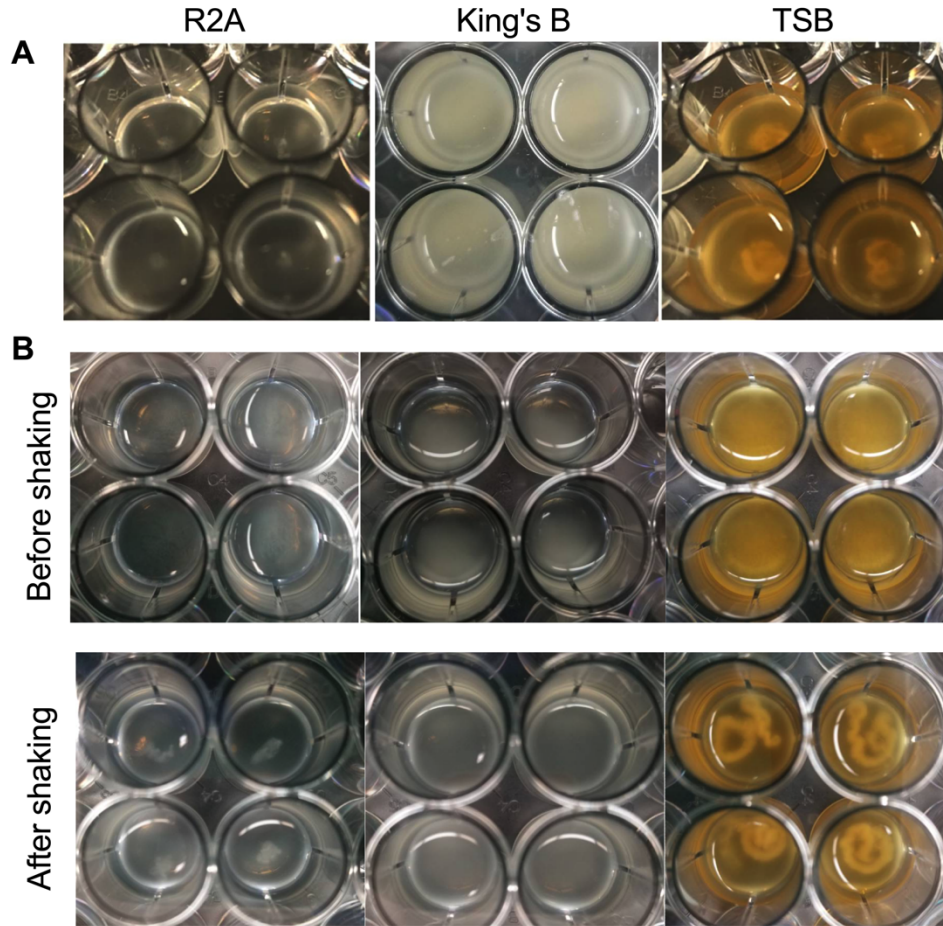

379

380 **Figure 8. *P. alcaliphila* produced floating biofilm mat.** A) R2A, King's B and trypticase soy  
381 broth were inoculated with *P. alcaliphila* and incubated at room temperature with shaking (150  
382 rpm). B) R2A, King's B and trypticase soy broth was inoculated with *P. alcaliphila* and incubated  
383 at room temperature without shaking. After incubation, plates were shaken (150 rpm) for 1h.  
384 Representative images of 4 wells of a 24-well plates are shown.

385

### 386 3.7 Toxoflavin is toxic for *Vermamoeba vermiformis*

387

388 Since *P. alcaliphila* was also negatively correlated with the presence of host cells in cooling towers  
389 (Paranjape et al., 2020a), we next hypothesize that toxoflavin might be toxic for amoebas typically



390 found in water systems. Therefore, we monitored the growth of *V. vermiformis* when exposed to  
391 toxoflavin (Figure 9). Within four days, cells unexposed to toxoflavin grew by 7.6-fold. In contrast,  
392 cells exposed to 10 µg/ml and 25 µg/ml, grew much less, by a factor of 3.7 and 3.3 respectively.  
393 Cells exposed to higher concentration show a sharp decrease in cell number at day 2. By day 4 the  
394 cells have grown back to the number of cells present at the start of the experiment, suggesting that  
395 toxoflavin is metabolized by *V. vermiformis* over time.  
396

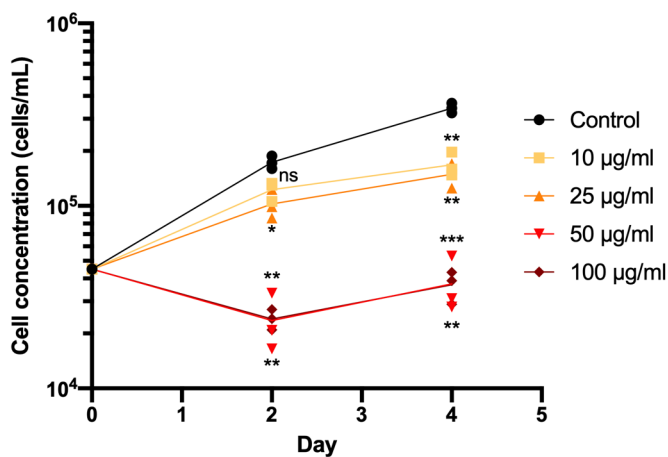

397

398 **Figure 9: Toxoflavin inhibits axenic growth of *V. vermiformis*.** *V. vermiformis* was cultured in  
399 PYFNH to a concentration of 50,000 cells/mL and exposed to 10 µg/ml, 25 µg/ml, 50 µg/ml and  
400 100 µg/ml of toxoflavin. Cultures without toxoflavin served as a control. Cell concentration was  
401 determined using flow cytometry at day 0, 2 and 4. A two-way ANOVA with a Tukey correction  
402 for multiple comparison was used to assess significance of each test conditions compared to the  
403 control (ns, non-significant, \*  $P < 0.05$ , \*\*  $P < 0.01$ , \*\*\*  $P < 0.001$ )  
404

405

#### 406 4. DISCUSSION

407

408 Several previous studies have shown an inverse relationship between the presence of *L.*  
409 *pneumophila* and *Pseudomonas* in cooling towers (Llewellyn et al., 2017; Paranjape et al., 2020b).

410 By using *Pseudomonas*-specific 16S rRNA amplicon sequencing approach (Pereira et al., 2018),

411 we identified that members of *P. alcaliphila/oleovorans* cluster are the main species associated with

412 the exclusion of *L. pneumophila* from cooling towers. The dominance of *P. alcaliphila/oleovorans*

413 is surprising as a previous study of a single cooling towers located in Braunschweig, Germany,

414 found a high diversity of species even when *P.alcaliphila/oleovorans* was a member of the core

415 community (Pereira et al., 2018). Differences in source water or cooling tower management could

416 explain the dominance of *P. alcaliphila/oleovorans* in our cooling tower samples compared to

417 those in Germany. The diversity and abundance of *Pseudomonas* may also be affected by seasons,

418 but this could not be investigated with our current data set. Importantly, the presence of *P.*

419 *alcaliphila/oleovorans* was strongly associated with continuous disinfectant application. This

420 strategy presumably creates conditions favorable for this group or specific members of this group.

421

422 Our analysis also revealed that some species of *Pseudomonas* may be beneficial for *L.*

423 *pneumophila*. LEfSe analysis suggest that members of the *P. monteilii* cluster and *P. alcaligenes*

424 are positively associated with *L. pneumophila* (Figure 4A). For example, it has been reported that

425 in an environment lacking critical nutrients for its growth, *L. pneumophila* can form microcolonies

426 around certain aquatic bacteria including *Flavobacterium breve* (Wadowsky and Yee, 1983) and

427 *Pseudomonas alcaligenes* (Çotuk et al., 2005).

428

429 Unfortunately, the method used is not able to differentiate between members of the *P.*  
430 *alcaliphila/oleovorans* cluster as the region targeted is identical. In addition to *P. alcaliphila* and  
431 *P. oleovorans*, this cluster also contain *P. chengduensis* (Pereira et al., 2018). These three species  
432 are associated with various water environment (Peix et al., 2018; Tao et al., 2014). It is possible  
433 that the cooling towers studied here contain a diversity of species belonging to this cluster. The  
434 water of the cooling towers included in this study was typically between 20-25 °C and pH 8  
435 (Paranjape et al., 2020b). This falls within the conditions that *P. alcaliphila* JCM 10630 can thrive  
436 in, having been isolated from sea water and shown to be alkali-tolerant and psychrophilic, growing  
437 best at temperature between 4 and 30 °C (Yumoto et al., 2001).

438

439 In this study, we found that *P. alcaliphila* was able to inhibit *L. pneumophila* growth was, at least  
440 in part, through toxoflavin production. We found that 0.5 µg of toxoflavin directly inhibit *L.*  
441 *pneumophila* growth on plates, and that a concentration of 25 µg/mL inhibits the growth of *L.*  
442 *pneumophila* host *V. vermiformis*. Genomic analysis revealed that *P. alcaliphila* also contains a  
443 homologue of the toxoflavin biosynthetic cluster and the presence of toxoflavin was confirmed in  
444 corresponding organic extracts. Inhibition appeared to be temperature-dependent since *P.*  
445 *alcaliphila* inhibited *L. pneumohila* growth at 30°C but not 37 °C. Multiple mechanisms could  
446 explain this phenomenon. It could be that the rate of growth of *L. pneumophila* is far greater than  
447 *P. alcaliphila* at 37°C, and so outpaced the accumulation of toxoflavin. The other possibility is  
448 that temperature affects toxoflavin production. To our knowledge, regulation of toxoflavin  
449 production by temperature has not been reported in *Pseudomonas spp.* However, *Pseudomonas* is  
450 recognized for having complex quorum sensing systems, which have been studied extensively in

451 *P. aeruginosa* (Chadha et al., 2021). Therefore, the regulation of toxoflavin production by quorum  
452 sensing could explain this result. The toxoflavin biosynthetic gene cluster has been thoroughly  
453 studied in detail in *B. glumae* and in *Pseudomonas protegens* (Chen et al., 2012). In *B. glumae*,  
454 toxoflavin is regulated by quorum sensing system involving TofI, encoding the *N*-octanoyl  
455 homoserine lactone synthase, and the associate receptor TofR (Chen et al., 2012; Kim et al., 2004).  
456 In turn, TofR induced expression of ToxJ, which induced expression of ToxR, the main regulator  
457 of the toxoflavin biosynthesis and transporter loci (Chen et al., 2012; Kim et al., 2004). The *P.*  
458 *alcaliphila* JCM 10630 genome contains a homologue of tofR (40% identity) but no homologue  
459 of TofI could be identified. Whether or not toxoflavin production is regulated by quorum sensing  
460 system in *P. alcaliphila* will require additional experiments.

461

462 It is extremely unlikely that *P. alcaliphila* can produce enough toxoflavin for it to accumulate in  
463 cooling towers and reach inhibitory concentrations in bulk water. However, local concentrations  
464 in biofilms or floating mats could potentially reach inhibitory or lethal concentrations for *L.*  
465 *pneumophila* and/or *V. vermiformis* since *Pseudomonas* are known to form a diversity of biofilm  
466 structure (Kozal et al., 2020). Indeed, we showed that *P. alcaliphila* cells can aggregate in pure  
467 culture to form floating mats, but not an attached biofilm. This does not eliminate the possibility  
468 that *P. alcaliphila* can colonize surfaces in water system or multispecies biofilm. We also cannot  
469 rule out that other compounds contributed to the inhibition of *L. pneumophila* by *P. alcaliphila*.  
470 Of note, RiPP-like type biosynthetic gene clusters includes bacteriocin and other antimicrobial  
471 peptide-derived molecules (Arnison et al., 2012). Similarly, it is possible that the member of the  
472 *P. alcaliphila/oleovorans* cluster found in cooling towers is different from the isolate used in this

473 study, and so other or additional BCG and corresponding molecules could be acting as *L.*  
474 *pneumophila* inhibitors.

475

476

## 477 5. CONCLUSION

478

479 *Pseudomonas* specific 16S amplicon sequencing increased the species-level resolution of our data  
480 which allowed us to narrow down candidate species responsible for the exclusion of *L.*  
481 *pneumophila* in cooling towers. The absence of *L. pneumophila* was most strongly associated with  
482 the presence of *P. alcaliphila/oleovorans*. Inspection of the genome of a member of *P.*  
483 *alcaliphila/oleovorans* revealed a biosynthetic gene clusters (BCGs) homologous to toxoflavin  
484 synthesis cluster of *B. glumae*. Using LC-MS/MS, toxoflavin was found in extracts from *P.*  
485 *alcaliphila* agar. Toxoflavin is known to be toxic to many microorganisms, we confirmed that this  
486 is also the case for both *L. pneumophila* and its host *V. vermiformis* using commercial toxoflavin.  
487 To our knowledge, this is the first report of a *P. alcaliphila* strain that produces toxoflavin and  
488 which inhibits the growth of *L. pneumophila*. In water systems, this inhibitory effect would be  
489 strongest near or within densely populated biofilms or floating mats that *P. alcaliphila* is capable  
490 of forming in different media. Finally, toxoflavin was only one of many candidate molecules, as  
491 other biosynthetic gene clusters were identified in *P. alcaliphila*. Multiple molecules could be  
492 contributing to inhibitory effects of *Pseudomonas* in cooling towers and will need to be  
493 investigated.

494

495 **ACKNOWLEDGEMENT**

496 We are indebted to Rui P. A. Pereira for sharing the *Pseudomonas* phylogeny database and  
497 providing guidance on performing *Pseudomonas*-specific 16S amplicon sequencing. We are  
498 thankful to Jesse Shapiro and his team for assistance regarding analysis of the amplicon sequencing  
499 data. This work was supported by a FRQNT Team grant (2016-PR-188813) and a Natural Science  
500 and Engineering Research Council of Canada Discovery Grant (RGPIN/04499-2018) to SPF. The  
501 graphical abstract was created with BioRender.com.

502

503 **COMPETING INTEREST STATEMENT**

504 The authors have no competing interest to declare.

505

506 **REFERENCES**

507

- 508 Arnison, P.G., Bibb, M.J., Bierbaum, G., Bowers, A.A., Bugni, T.S., Bulaj, G., Camarero, J.A.,  
509 Campopiano, D.J., Challis, G.L., Clardy, J., Cotter, P.D., Craik, D.J., Dawson, M., Dittmann,  
510 E., Donadio, S., Dorrestein, P.C., Entian, K.-D., Fischbach, M.A., Garavelli, J.S., Göransson,  
511 U., Gruber, C.W., Haft, D.H., Hemscheidt, T.K., Hertweck, C., Hill, C., Horswill, A.R.,  
512 Jaspars, M., Kelly, W.L., Klinman, J.P., Kuipers, O.P., Link, A.J., Liu, W., Marahiel, M.A.,  
513 Mitchell, D.A., Moll, G.N., Moore, B.S., Müller, R., Nair, S.K., Nes, I.F., Norris, G.E.,  
514 Olivera, B.M., Onaka, H., Patchett, M.L., Piel, J., Reaney, M.J.T., Rebuffat, S., Ross, R.P.,  
515 Sahl, H.-G., Schmidt, E.W., Selsted, M.E., Severinov, K., Shen, B., Sivonen, K., Smith, L.,  
516 Stein, T., Süßmuth, R.D., Tagg, J.R., Tang, G.-L., Truman, A.W., Vederas, J.C., Walsh, C.T.,  
517 Walton, J.D., Wenzel, S.C., Willey, J.M., Donk, W.A. van der, 2012. Ribosomally synthesized  
518 and post-translationally modified peptide natural products: overview and recommendations for  
519 a universal nomenclature. *Nat Prod Rep* 30, 108–160. <https://doi.org/10.1039/c2np20085f>
- 520 Berjeaud, J.-M., Chevalier, S., Schlüsselhuber, M., Portier, E., Loiseau, C., Aucher, W.,  
521 Lesouhaitier, O., Verdon, J., 2016. *Legionella pneumophila*: The Paradox of a Highly  
522 Sensitive Opportunistic Waterborne Pathogen Able to Persist in the Environment. *Front.*  
523 *Microbio.* 7, 21660. <https://doi.org/10.1016/j.bbamem.2014.07.003>
- 524 Blin, K., Shaw, S., Steinke, K., Villebro, R., Ziemert, N., Lee, S.Y., Medema, M.H., Weber, T.,  
525 2019. antiSMASH 5.0: updates to the secondary metabolite genome mining pipeline. *Nucleic*  
526 *Acids Res* 47, W81–W87. <https://doi.org/10.1093/nar/gkz310>

527 Boamah, D.K., Zhou, G., Ensminger, A.W., O’connor, T.J., 2017. From Many Hosts, One  
528 Accidental Pathogen: The Diverse Protozoan Hosts of Legionella. *Front Cell Infect Microbiol*  
529 7, 21660. <https://doi.org/10.1007/s00436-012-3106-4>

530 Bolyen, E., Rideout, J.R., Dillon, M.R., Bokulich, N.A., Abnet, C.C., Al-Ghalith, G.A., Alexander,  
531 H., Alm, E.J., Arumugam, M., Asnicar, F., Bai, Y., Bisanz, J.E., Bittinger, K., Brejnrod, A.,  
532 Brislawn, C.J., Brown, C.T., Callahan, B.J., guez, A. x000E9 s M.C.-R. x000ED, Chase, J.,  
533 Cope, E.K., Silva, R., Diener, C., Dorrestein, P.C., Douglas, G.M., Durall, D.M., Duvallet, C.,  
534 Edwardson, C.F., Ernst, M., Estaki, M., Fouquier, J., Gauglitz, J.M., Gibbons, S.M., Gibson,  
535 D.L., González, A., Gorlick, K., Guo, J., Hillmann, B., Holmes, S., Holste, H., Huttenhower,  
536 C., Huttley, G.A., Janssen, S., Jarmusch, A.K., Jiang, L., Kaehler, B.D., Kang, K.B., Keefe,  
537 C.R., Keim, P., Kelley, S.T., Knights, D., Koester, I., Kosciulek, T., Kreps, J., Langille, M.G.I.,  
538 Lee, J., Ley, R., Liu, Y.-X., Loftfield, E., Lozupone, C., Maher, M., Marotz, C., Martin, B.D.,  
539 McDonald, D., McIver, L.J., Melnik, A.V., Metcalf, J.L., Morgan, S.C., Morton, J.T., Naimey,  
540 A.T., Navas-Molina, J.A., Nothias, L.F., Orchanian, S.B., Pearson, T., Peoples, S.L., Petras,  
541 D., Preuss, M.L., Pruesse, E., Rasmussen, L.B., Rivers, A., Robeson, M.S., Rosenthal, P.,  
542 Segata, N., Shaffer, M., Shiffer, A., Sinha, R., Song, S.J., Spear, J.R., Swafford, A.D.,  
543 Thompson, L.R., Torres, P.J., Trinh, P., Tripathi, A., Turnbaugh, P.J., Ul-Hasan, S., Hooft,  
544 J.J.J., Vargas, F., zquez-Baeza, Y.V. x000E1, Vogtmann, E., Hippel, M. von, Walters, W.,  
545 Wan, Y., Wang, M., Warren, J., Weber, K.C., Williamson, C.H.D., Willis, A.D., Xu, Z.Z.,  
546 Zaneveld, J.R., Zhang, Y., Zhu, Q., Knight, R., Caporaso, J.G., 2019. Reproducible,  
547 interactive, scalable and extensible microbiome data science using QIIME 2. *Nature*  
548 *Biotechnology* 1–6. <https://doi.org/10.1038/s41587-019-0209-9>



- 549 Callahan, B.J., McMurdie, P.J., Rosen, M.J., Han, A.W., Johnson, A.J.A., Holmes, S.P., 2016.  
550 DADA2: High-resolution sample inference from Illumina amplicon data. Nature Publishing  
551 Group 13, 581–583. <https://doi.org/10.1038/nmeth.3869>
- 552 Cassini, A., Colzani, E., Pini, A., Mangen, M.-J.J., Plass, D., McDonald, S.A., Maringhini, G.,  
553 Lier, A. van, Haagsma, J.A., Havelaar, A.H., Kramarz, P., Kretzschmar, M.E., consortium, on  
554 behalf of the Bc., 2018. Impact of infectious diseases on population health using incidence-  
555 based disability-adjusted life years (DALYs): results from the Burden of Communicable  
556 Diseases in Europe study, European Union and European Economic Area countries, 2009 to  
557 2013. Euro Surveill 23. <https://doi.org/10.2807/1560-7917.es.2018.23.16.17-00454>
- 558 Chadha, J., Harjai, K., Chhibber, S., 2021. Revisiting the virulence hallmarks of *Pseudomonas*  
559 *aeruginosa*: a chronicle through the perspective of quorum sensing. Environ Microbiol.  
560 <https://doi.org/10.1111/1462-2920.15784>
- 561 Chen, R., Barphagha, I.K., Karki, H.S., Ham, J.H., 2012. Dissection of Quorum-Sensing Genes in  
562 *Burkholderia glumae* Reveals Non-Canonical Regulation and the New Regulatory Gene *tofM*  
563 for Toxoflavin Production. PLoS ONE 7, e52150-15.  
564 <https://doi.org/10.1371/journal.pone.0052150>
- 565 Chong, J., Liu, P., Zhou, G., Xia, J., 2020. Using MicrobiomeAnalyst for comprehensive  
566 statistical, functional, and meta-analysis of microbiome data. Nat Protoc 1–25.  
567 <https://doi.org/10.1038/s41596-019-0264-1>
- 568 Corre, M.-H., Delafont, V., Legrand, A., Berjeaud, J.-M., Verdon, J., 2019. Exploiting the  
569 Richness of Environmental Waterborne Bacterial Species to Find Natural *Legionella*  
570 *pneumophila* Competitors. Front Microbiol 9, 3360.  
571 <https://doi.org/10.3389/fmicb.2018.03360>

- 572 Corre, M.-H., Mercier, A., Bouteiller, M., Khalil, A., Ginevra, C., Depayras, S., Dupont, C.,  
573 Rouxel, M., Gallique, M., Grac, L., Jarraud, S., Giron, D., Merieau, A., Berjeaud, J.-M.,  
574 Verdon, J., 2021. Bacterial Long-Range Warfare: Aerial Killing of *Legionella pneumophila*  
575 by *Pseudomonas fluorescens*. *Microbiology Spectrum* 9, e0040421.  
576 <https://doi.org/10.1128/spectrum.00404-21>
- 577 Çotuk, A., Dogruoz, N., Zeybek, Z., Kimiran-Erdem, A., Ilhan-Sungur, E., 2005. The effects of  
578 *Pseudomonas* and *Aeromonas* strains on *Legionella pneumophila* growth. *Annals of*  
579 *Microbiology* 55, 219–224.
- 580 Cunha, B.A., Burillo, A., Bouza, E., 2016. Legionnaires' disease. *Lancet* 387, 376–385.  
581 [https://doi.org/10.1016/s0140-6736\(15\)60078-2](https://doi.org/10.1016/s0140-6736(15)60078-2)
- 582 Fields, B.S., Shotts, E.B., Feeley, J.C., Gorman, G.W., Martin, W.T., 1984. Proliferation of  
583 *Legionella pneumophila* as an intracellular parasite of the ciliated protozoan *Tetrahymena*  
584 *pyriformis*. *Applied and Environmental Microbiology* 47, 467–471.  
585 <https://doi.org/10.1128/aem.47.3.467-471.1984>
- 586 Garrison, L.E., Kunz, J.M., Cooley, L.A., Moore, M.R., Lucas, C., Schrag, S., Sarisky, J., Whitney,  
587 C.G., 2016. Vital Signs: Deficiencies in Environmental Control Identified in Outbreaks of  
588 Legionnaires' Disease - North America, 2000-2014. *MMWR Morb. Mortal. Wkly. Rep.* 65,  
589 576–584. <https://doi.org/10.15585/mmwr.mm6522e1>
- 590 Gregorio, L.D., Tandoi, V., Congestri, R., Rossetti, S., Pippo, F.D., 2017. Unravelling the core  
591 microbiome of biofilms in cooling tower systems. *Biofouling* 1–14.  
592 <https://doi.org/10.1080/08927014.2017.1367386>

- 593 Guerrieri, E., Bondi, M., Sabia, C., Niederhäusern, S. de, Borella, P., Messi, P., 2008. Effect of  
594 Bacterial Interference on Biofilm Development by *Legionella pneumophila*. *Curr Microbiol*  
595 57, 532–536. <https://doi.org/10.1007/s00284-008-9237-2>
- 596 Hauer, T., Čapek, P., Böhmová, P., 2016. Main photoautotrophic components of biofilms in  
597 natural draft cooling towers. *Folia Microbiologica* 61, 1–7. [https://doi.org/10.1007/s12223-](https://doi.org/10.1007/s12223-015-0429-4)  
598 015-0429-4
- 599 Heijnsbergen, E. van, Schalk, J.A.C., Euser, S.M., Brandsema, P.S., Boer, J.W.D., Husman, A.M.  
600 de R., 2015. Confirmed and potential sources of legionella reviewed. *Environ. Sci. Technol.*  
601 49, 4797–4815. <https://doi.org/10.1021/acs.est.5b00142>
- 602 Kanehisa, M., Sato, Y., Morishima, K., 2016. BlastKOALA and GhostKOALA: KEGG Tools for  
603 Functional Characterization of Genome and Metagenome Sequences. *J Mol Biol* 428, 726–  
604 731. <https://doi.org/10.1016/j.jmb.2015.11.006>
- 605 Kim, Jinwoo, Kim, Jung-Gun, Kang, Y., Jang, J.Y., Jog, G.J., Lim, J.Y., Kim, S., Suga, H.,  
606 Nagamatsu, T., Hwang, I., 2004. Quorum sensing and the LysR-type transcriptional activator  
607 ToxR regulate toxoflavin biosynthesis and transport in *Burkholderia glumae*. *Mol Microbiol*  
608 54, 921–934. <https://doi.org/10.1111/j.1365-2958.2004.04338.x>
- 609 Koza, A., Jerdan, R., Cameron, S., Spiers, A.J., 2020. Three biofilm types produced by a model  
610 pseudomonad are differentiated by structural characteristics and fitness advantage.  
611 *Microbiology (Reading, Engl)* 166, 707–716. <https://doi.org/10.1099/mic.0.000938>
- 612 Lévesque, S., Plante, P.-L., Mendis, N., Cantin, P., Marchand, G., Charest, H., Raymond, F., Huot,  
613 C., Goupil-Sormany, I., Desbiens, F., Faucher, S.P., Corbeil, J., Tremblay, C., 2014. Genomic  
614 Characterization of a Large Outbreak of *Legionella pneumophila* Serogroup 1 Strains in

615 Quebec City, 2012. PLoS ONE 9, e103852.  
616 <https://doi.org/10.1371/journal.pone.0103852.t002>

617 Llewellyn, A.C., Lucas, C.E., Roberts, S.E., Brown, E.W., Nayak, B.S., Raphael, B.H., Winchell,  
618 J.M., 2017. Distribution of Legionella and bacterial community composition among regionally  
619 diverse US cooling towers. PLoS ONE 12, e0189937.  
620 <https://doi.org/10.1371/journal.pone.0189937.s003>

621 Loiseau, C., Schlusshuber, M., Bigot, R., Bertaux, J., Berjeaud, J.-M., Verdon, J., 2015. Surfactin  
622 from *Bacillus subtilis* displays an unexpected anti-Legionella activity. Appl Microbiol  
623 Biotechnol 99, 5083–5093. <https://doi.org/10.1007/s00253-014-6317-z>

624 Mann, E.E., Wozniak, D.J., 2012. Pseudomonas biofilm matrix composition and niche biology.  
625 Fems Microbiol Rev 36, 893–916. <https://doi.org/10.1111/j.1574-6976.2011.00322.x>

626 Meyer, R.D., 1983. Legionella infections: a review of five years of research. Rev. Infect. Dis. 5,  
627 258–278. <https://doi.org/10.1093/clinids/5.2.258>

628 Morel, F.M.M., Westall, J.C., Rueter, J.G., JP, C., 1975. Description of algal growth media AQUIL  
629 and FRAQUIL., R.M. Parsons Laboratory for Water Resources and Hydrodynamics,  
630 Massachusetts Institute of Technology, Cambridge, MA. R.M. Parsons Laboratory for Water  
631 Resources and Hydrodynamics, Massachusetts Institute of Technology, Cambridge, MA.

632 Mouchtouri, V.A., Goutziana, G., Kremastinou, J., Hadjichristodoulou, C., 2010. Legionella  
633 species colonization in cooling towers: risk factors and assessment of control measures. Am J  
634 Infect Control 38, 50–55. <https://doi.org/10.1016/j.ajic.2009.04.285>

635 Paniagua, A.T., Paranjape, K., Hu, M., Bédard, E., Faucher, S.P., 2020. Impact of temperature on  
636 Legionella pneumophila, its protozoan host cells, and the microbial diversity of the biofilm

- 637 community of a pilot cooling tower. *Science of the Total Environment*, The 712, 136131.  
638 <https://doi.org/10.1016/j.scitotenv.2019.136131>
- 639 Paranjape, K., Bédard, E., Shetty, D., Hu, M., Choon, F.C.P., Prévost, M., Faucher, S.P., 2020a.  
640 Unravelling the importance of the eukaryotic and bacterial communities and their relationship  
641 with *Legionella* spp. ecology in cooling towers: a complex network. *Microbiome* 8, 157–19.  
642 <https://doi.org/10.1186/s40168-020-00926-6>
- 643 Paranjape, K., Bédard, E., Whyte, L.G., Ronholm, J., Prévost, M., Faucher, S.P., 2020b. Presence  
644 of *Legionella* spp. in cooling towers: the role of microbial diversity, *Pseudomonas*, and  
645 continuous chlorine application. *Water Res.* 169, 115252.  
646 <https://doi.org/10.1016/j.watres.2019.115252>
- 647 Peix, A., Ramírez-Bahena, M.-H., Velázquez, E., 2018. The current status on the taxonomy of  
648 *Pseudomonas* revisited\_ An update. *Infection, Genetics and Evolution* 57, 106–116.  
649 <https://doi.org/10.1016/j.meegid.2017.10.026>
- 650 Pereira, R.P.A., Peplies, J., Höfle, M.G., Brettar, I., 2017. Bacterial community dynamics in a  
651 cooling tower with emphasis on pathogenic bacteria and *Legionella* species using universal  
652 and genus-specific deep sequencing. *Water Res.* 122, 363–376.  
653 <https://doi.org/10.1016/j.watres.2017.06.011>
- 654 Pereira, R.P.A., Peplies, J., Mushi, D., Brettar, I., Höfle, M.G., 2018. *Pseudomonas*-Specific NGS  
655 Assay Provides Insight Into Abundance and Dynamics of *Pseudomonas* Species Including *P.*  
656 *aeruginosa* in a Cooling Tower. *Front. Microbio.* 9, 334–15.  
657 <https://doi.org/10.3389/fmicb.2018.01958>
- 658 Philmus, B., Shaffer, B.T., Kidarsa, T.A., Yan, Q., Raaijmakers, J.M., Begley, T.P., Loper, J.E.,  
659 2015. Investigations into the Biosynthesis, Regulation, and Self-Resistance of Toxoflavin in

- 660 *Pseudomonas protegens* Pf-5. *Chembiochem* 16, 1782–1790.  
661 <https://doi.org/10.1002/cbic.201500247>
- 662 Pinel, I.S.M., Hankinson, P.M., Moed, D.H., Wyseure, L.J., Vrouwenvelder, J.S., Loosdrecht,  
663 M.C.M. van, 2021. Efficient cooling tower operation at alkaline pH for the control of  
664 *Legionella pneumophila* and other pathogenic genera. *Water Res.* 197, 117047.  
665 <https://doi.org/10.1016/j.watres.2021.117047>
- 666 Quast, C., Pruesse, E., Yilmaz, P., Gerken, J., Schweer, T., Yarza, P., Peplies, J., Glöckner, F.O.,  
667 2013. The SILVA ribosomal RNA gene database project: improved data processing and web-  
668 based tools. *Nucleic Acids Res* 41, D590-6. <https://doi.org/10.1093/nar/gks1219>
- 669 Rowbotham, T.J., 1980. Preliminary report on the pathogenicity of *Legionella pneumophila* for  
670 freshwater and soil amoebae. *Journal of Clinical Pathology* 33, 1179–1183.  
671 <https://doi.org/10.1136/jcp.33.12.1179>
- 672 Segata, N., Izard, J., Waldron, L., Gevers, D., Miropolsky, L., Garrett, W.S., Huttenhower, C.,  
673 2011. Metagenomic biomarker discovery and explanation. *Genome Biol* 12, R60-18.  
674 <https://doi.org/10.1186/gb-2011-12-6-r60>
- 675 Suzuki, F., Sawada, H., Azegami, K., Tsuchiya, K., 2004. Molecular characterization of the tox  
676 operon involved in toxoflavin biosynthesis of *Burkholderia glumae*. *J Gen Plant Pathol* 70,  
677 97–107. <https://doi.org/10.1007/s10327-003-0096-1>
- 678 Tao, Y., Zhou, Y., He, X., Hu, X., Li, D., 2014. *Pseudomonas chengduensis* sp. nov., isolated from  
679 landfill leachate. *Int J Syst Evol Micr* 64, 95–100. <https://doi.org/10.1099/ijs.0.050294-0>
- 680 Taylor, Ross, K., Bentham, R., 2013. Spatial Arrangement of *Legionella* Colonies in Intact  
681 Biofilms from a Model Cooling Water System. *MBI* 6, 49. <https://doi.org/10.4137/mbi.s12196>

- 682 Temmerman, R., Vervaeren, H., Nosedá, B., Boon, N., Verstraete, W., 2007. Inhibition of  
683 *Legionella pneumophila* by *Bacillus* sp. Eng Life Sci 7, 497–503.  
684 <https://doi.org/10.1002/elsc.200620212>
- 685 Tsao, H.-F., Scheikl, U., Herbold, C., Indra, A., Walochnik, J., Horn, M., 2019. The cooling tower  
686 water microbiota: Seasonal dynamics and co-occurrence of bacterial and protist phylotypes.  
687 Water Res. 159, 464–479. <https://doi.org/10.1016/j.watres.2019.04.028>
- 688 Verdon, J., Berjeaud, J.-M., Lacombe, C., Héchard, Y., 2008. Characterization of anti-*Legionella*  
689 activity of warnericin RK and delta-lysin I from *Staphylococcus warneri*. Peptides 29, 978–  
690 984. <https://doi.org/10.1016/j.peptides.2008.01.017>
- 691 Wadowsky, R.M., Yee, R.B., 1983. Satellite growth of *Legionella pneumophila* with an  
692 environmental isolate of *Flavobacterium breve*. Applied and Environmental Microbiology 46,  
693 1447–1449. <https://doi.org/10.1128/aem.46.6.1447-1449.1983>
- 694 Wang, J., Liu, M., Xiao, H., Wu, W., Xie, M., Sun, M., Zhu, C., Li, P., 2013. Bacterial community  
695 structure in cooling water and biofilm in an industrial recirculating cooling water system.  
696 Water Sci Technol 68, 940–947. <https://doi.org/10.2166/wst.2013.334>
- 697 Yumoto, I., Yamazaki, K., Hishinuma, M., Nodasaka, Y., Suemori, A., Nakajima, K., Inoue, N.,  
698 Kawasaki, K., 2001. *Pseudomonas alcaliphila* sp. nov., a novel facultatively psychrophilic  
699 alkaliphile isolated from seawater. INTERNATIONAL JOURNAL OF SYSTEMATIC AND  
700 EVOLUTIONARY MICROBIOLOGY 51, 349–355. [https://doi.org/10.1099/00207713-51-2-](https://doi.org/10.1099/00207713-51-2-349)  
701 349  
702  
703

704 **TABLES**

705

706 **Table 1. Biosynthetic gene clusters identified in the genome of *P. alcaliphila* JCM 10630 with**  
 707 **antiSMASH.**

| Location in JCM 10630 | Type                   | Most similar cluster                   | Similarity |
|-----------------------|------------------------|----------------------------------------|------------|
| 50,792 - 83,086       | Betalactone            | Fengycin                               | 20 %       |
| 80,430 - 92,292       | Siderophore            | Putrebactin                            | 30 %       |
| 176,284-198,514       | Redox-cofactor         | Lankacidin                             | 13 %       |
| 199,774 - 214,675     | NAGGN <sup>1</sup>     | Pyoverdine                             | 2 %        |
| 494,171 - 505,013     | RiPP-like <sup>2</sup> | None                                   | NA         |
| 1,579,397 - 1,632,252 | Aryl polyene           | Aryl polyene of <i>Vibrio fischeri</i> | 45 %       |

708 <sup>1</sup> N-acetylglutaminylglutamine amide

709 <sup>2</sup> Ribosomally synthesised and post-translationally modified peptide product

710

711 **Table 2. Comparison of the genes in *P. alcaliphila* toxoflavin cluster with *B. glumae***

712 **homologues**

| Locus tag      | Protein product | Length | Annotated function                                                                                                   | Name | <i>B. glumae</i> homologue (% identity) |
|----------------|-----------------|--------|----------------------------------------------------------------------------------------------------------------------|------|-----------------------------------------|
| PAL02S_RS12525 | WP_074675559.1  | 388    | bifunctional diaminohydroxyphosphoribosylaminopyrimidine deaminase/5-amino-6-(5-phosphoribosylamino)uracil reductase | ToxE | bglu_2g06440 (42%)                      |
| PAL02S_RS12530 | WP_074675558.1  | 562    | WD40 repeat domain-containing protein                                                                                | ToxC | bglu_2g06420 (47%)                      |
| PAL02S_RS12535 | WP_074675557.1  | 201    | GTP cyclohydrolase II                                                                                                | ToxB | bglu_2g06410 (44%)                      |
| PAL02S_RS12540 | WP_139202874.1  | 340    | SUMF1/EgtB/PvdO family nonheme iron enzyme                                                                           | ToxD | bglu_2g06430 (54%)                      |
| PAL02S_RS12545 | WP_074675555.1  | 245    | class I SAM-dependent methyltransferase                                                                              | ToxA | bglu_2g06400 (68%)                      |
| PAL02S_RS12550 | WP_074675554.1  | 302    | LysR family transcriptional regulator                                                                                | ToxR | bglu_2g06390 (69%)                      |
| PAL02S_RS12555 | WP_074675553.1  | 157    | DMT family transporter                                                                                               | ToxF | bglu_2g06380 (64%)                      |
| PAL02S_RS12560 | WP_074675552.1  | 364    | efflux RND transporter periplasmic adaptor subunit                                                                   | ToxG | bglu_2g06370 (36%)                      |
| PAL02S_RS12565 | WP_074675551.1  | 1023   | MexW/MexI family multidrug efflux RND transporter permease subunit                                                   | ToxH | bglu_2g06360 (55%)                      |

713

714
